# Supplementary material
Source: PubMed Central journal article supplement (PMC10506066)
Supplement: NIHMS1920963-supplement-Supplement.pdf [file NIHMS1920963-supplement-Supplement.pdf]

# Supplementary Information

## Contents

|                                                                                   |        |
|-----------------------------------------------------------------------------------|--------|
| Extended sample size and power justification -----                                | Page 2 |
| <b>Figure S1.</b> Method of evaluation of the study endpoints -----               | Page 4 |
| <b>Table S1.</b> Patient baseline characteristics with descriptive p-values ----- | Page 5 |
| <b>Table S2.</b> Patient pre-interaction outcomes -----                           | Page 6 |
| Survey instruments-----                                                           | Page 7 |

## **Extended sample size and power justification**

A Phase II screening randomized trial design was used with a power of 80% and a two-sided type I error rate of 10% for two primary endpoints (anxiety and distress) and two secondary endpoints (adherence and satisfaction). The endpoints were evaluated using graphical sequential procedures to control the family-wise type I error rate at a two-sided alpha of 10% across all primary and secondary endpoints. [1]

As shown in **Figure S1**, if either primary endpoint is significant, the two-sided alpha will be recycled to another primary endpoint. Otherwise, each primary endpoint will be evaluated at a two-sided 5% level. More specifically, the evaluation order of two primary endpoints will be decided according to their p-values. That is, the primary endpoint with the smaller p-value will be first evaluated. If the primary endpoint with the smaller p-value is significant at a two-sided 5% level, the two-sided 5% level will be recycled to the other primary endpoint and the other primary endpoint will be evaluated at a two-sided 10% level. If the primary endpoint with the smaller p-value is not significant at a two-sided 5% level, the other primary endpoint will be evaluated at a two-sided 5% level.

The study will be declared positive if at least one of two primary endpoints is significant. When at least one primary endpoint is positive, the first secondary endpoint (adherence) will be evaluated at a two-sided 5% level (if only one primary endpoint is positive) or at a two-sided 10% level (if both primary endpoints are positive) and, if the first secondary endpoint (adherence) is positive, the second secondary endpoint (satisfaction) will be evaluated at a two-sided alpha recycled from the first secondary endpoint. When both primary endpoints are negative, the secondary objectives will be deemed to be exploratory.

Both primary endpoints will be measured at three time points for each patient and so the sample size was estimated with a linear mixed-effects model through 1,000 simulations (using PASS 2019 [NCSS, LCC. Kaysville, Utah, USA, [ncss.com/software/pass](http://ncss.com/software/pass)] with the procedure ‘Mixed Models [Simulation]’). The estimated standard deviation for anxiety was 8.13 points based on the previous prospective single-arm phase II trial [2], and we assumed that the clinically meaningful difference in anxiety between control and

intervention arms is at least 10 points, which yielded an effect size of about 1.2. Thus, the study was designed to detect an effect size of 1.2 for any of primary and secondary endpoints at a two-sided 5% level. In other words, the sample size was estimated to detect an effect size of 1.2 for any primary and secondary endpoints at a two-sided 5% level. For primary and secondary objectives, 38 patients (= 19 patients x two groups) would allow us to have at least 80% power, using a linear mixed-effects model at a two-sided 5% level, when both estimated within- and between-variances are assumed to be one and the autocorrelation is 0.3. With 38 patients, the first secondary objective would have 95% power when a two-sided unpaired t-test is used at a 5% level.

At the time of data analysis, according to Figure S1, the primary endpoint of anxiety was evaluated at a two-sided 5% level and, because the anxiety was significant, another primary endpoint of distress was evaluated at a two-sided 10% level. Since one of the primary endpoints (anxiety) was significant, the study was declared positive. Thus, the first secondary endpoint (adherence) was evaluated at a two-sided 5% level, while the second secondary objective (satisfaction) became exploratory and descriptive because the first secondary endpoint (adherence) was not significant. Consequently, as shown in **Table 1**, the powered analyses were the overall comparisons between groups at all three visits for the two primary endpoints, anxiety and distress, and the first secondary endpoint, patient treatment adherence. All other analyses, such as overall satisfaction, three technical satisfaction questions, comparisons at each visit, pre-interaction outcomes, and subgroup analysis, were exploratory, which should be interpreted descriptively. For those exploratory analyses, no hypothesis testing was performed, so estimated group differences and associated 95% confidence intervals (CIs) were provided without p-values.

## References

1. Bretz, F., et al., *A graphical approach to sequentially rejective multiple test procedures*. *Stat Med*, 2009. **28**(4): p. 586-604.
2. Atwood, T.F., et al., *Establishing a New Clinical Role for Medical Physicists: A Prospective Phase II Trial*. *Int J Radiat Oncol Biol Phys*, 2018. **102**(3): p. 635-641.

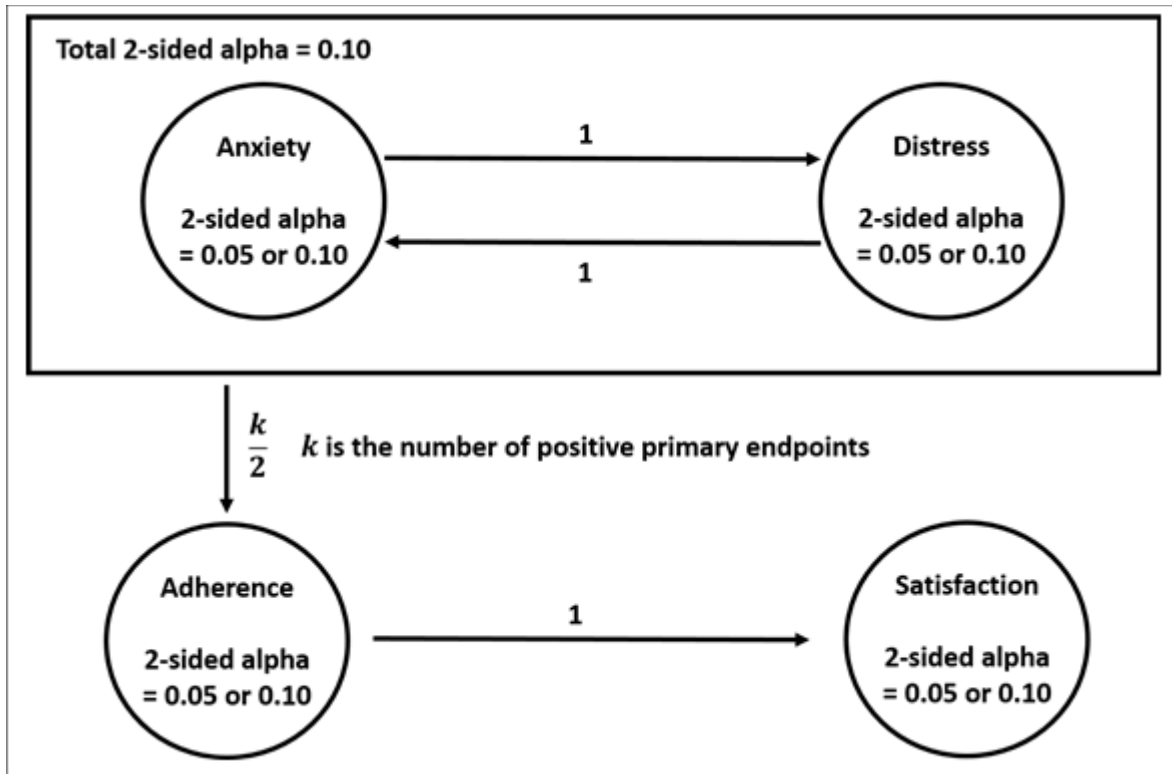

**Figure S1.** Method of evaluation of the study endpoints. Note  $k$  is the number of positive primary endpoints. That is, if both anxiety and distress are positive,  $k$  becomes 2 and so a 2-sided 10% level (i.e.,  $10\% = 10\% \times 2/2$ ) will be recycled to adherence; if only one primary endpoint is positive (which is the case of this presented study),  $k$  becomes 1 and so a 2-sided 5% level (i.e.,  $5\% = 10\% \times 1/2$ ) will be recycled to adherence; if both primary endpoints are not positive,  $k$  becomes 0 and no alpha (i.e.,  $0\% = 10\% \times 0/2$ ) will be recycled to adherence and adherence will be deemed to be exploratory.

**Table S1.** Patient baseline characteristics with descriptive p-values

|                                                     | All (n=44)    | Intervention (n=23) | Control (n=21) | Descriptive p* |
|-----------------------------------------------------|---------------|---------------------|----------------|----------------|
| <b>Age, year - mean (sd)</b>                        | 56.56 (12.09) | 60 (10.63)          | 52.95 (12.71)  | 0.056          |
| Missing                                             | 1             | 1                   | 0              |                |
| <b>Race - no. (%)</b>                               |               |                     |                | >0.99          |
| African-American or Black                           | 32 (73)       | 16 (70)             | 16 (76)        |                |
| Caucasian or White                                  | 9 (20)        | 5 (22)              | 4 (19)         |                |
| Other race or multiple races                        | 3 (7)         | 2 (9)               | 1 (5)          |                |
| <b>Hispanic or Latina - no. (%)</b>                 |               |                     |                | >0.99          |
| Yes                                                 | 2 (5)         | 1 (4)               | 1 (5)          |                |
| No                                                  | 41 (93)       | 21 (91)             | 20 (95)        |                |
| Missing                                             | 1 (2)         | 1 (4)               | 0 (0)          |                |
| <b>Gender - no. (%)</b>                             |               |                     |                | >0.99          |
| Male                                                | 1 (2)         | 1 (4)               | 0 (0)          |                |
| Female                                              | 42 (95)       | 21 (91)             | 21 (100)       |                |
| Other                                               | 1 (2)         | 1 (4)               | 0 (0)          |                |
| <b>Education Level - no. (%)</b>                    |               |                     |                | 0.078          |
| Less than high school                               | 6 (14)        | 5 (22)              | 1 (5)          |                |
| High School/GED                                     | 13 (30)       | 6 (26)              | 7 (33)         |                |
| Some College                                        | 8 (18)        | 4 (17)              | 4 (19)         |                |
| 2-year college degree                               | 8 (18)        | 1 (4)               | 7 (33)         |                |
| 4-year college degree                               | 4 (9)         | 3 (13)              | 1 (5)          |                |
| Graduate/professional degree                        | 5 (11)        | 4 (17)              | 1 (5)          |                |
| <b>Marital Status - no. (%)</b>                     |               |                     |                | 0.841          |
| Married                                             | 9 (20)        | 5 (22)              | 4 (19)         |                |
| Living with partner in a marriage-like relationship | 4 (9)         | 1 (4)               | 3 (14)         |                |
| Widowed                                             | 4 (9)         | 3 (13)              | 1 (5)          |                |
| Divorced                                            | 10 (23)       | 5 (22)              | 5 (24)         |                |
| Separated                                           | 3 (7)         | 2 (9)               | 1 (5)          |                |
| Never married                                       | 14 (32)       | 7 (30)              | 7 (33)         |                |
| <b>Household Income – no. (%)</b>                   |               |                     |                | 0.718          |
| Less than 20,000                                    | 12 (27)       | 8 (35)              | 4 (19)         |                |
| 20,000-39,999                                       | 11 (25)       | 4 (17)              | 7 (33)         |                |
| 40,000-59,999                                       | 9 (20)        | 4 (17)              | 5 (24)         |                |
| 60,000-79,999                                       | 4 (9)         | 2 (9)               | 2 (10)         |                |
| 80,000-99,999                                       | 2 (5)         | 1 (4)               | 1 (5)          |                |
| 100,000-149,000                                     | 1 (2)         | 0 (0)               | 1 (5)          |                |
| 150,000 or more                                     | 1 (2)         | 1 (4)               | 0 (0)          |                |
| Missing                                             | 4 (9)         | 3 (13)              | 1 (5)          |                |
| <b>Insurance - no. (%)</b>                          |               |                     |                | 0.516          |
| No private insurance                                | 29 (66)       | 17 (74)             | 12 (57)        |                |
| Private insurance                                   | 13 (30)       | 6 (26)              | 7 (33)         |                |
| Missing                                             | 2 (5)         | 0 (0)               | 2 (10)         |                |
| <b>Employment Status - no. (%)</b>                  |               |                     |                | 0.213          |
| Employed full time                                  | 9 (20)        | 2 (9)               | 7 (33)         |                |
| Employed part time                                  | 6 (14)        | 4 (17)              | 2 (10)         |                |
| Caring for home and/or family                       | 1 (2)         | 1 (4)               | 0 (0)          |                |
| Unemployed and looking for work                     | 3 (7)         | 2 (9)               | 1 (5)          |                |
| Unable to work due to illness or disability         | 10 (23)       | 4 (17)              | 6 (29)         |                |
| Retired                                             | 12 (27)       | 7 (30)              | 5 (24)         |                |
| Student                                             | 3 (7)         | 3 (13)              | 0 (0)          |                |

\* P value is calculated by t-test for continuous variables and Fisher's exact test for categorical variables; sd, standard deviation

**Table S2. Patient pre-interaction outcomes**

|                                                                                                                                                                                                                                                     | Mean (sd)     |                        |                   | Difference<br>(95% CI)  |
|-----------------------------------------------------------------------------------------------------------------------------------------------------------------------------------------------------------------------------------------------------|---------------|------------------------|-------------------|-------------------------|
|                                                                                                                                                                                                                                                     | All<br>(n=44) | Intervention<br>(n=23) | Control<br>(n=21) |                         |
| <b>Health Literacy:</b> 3-item, 5-point Likert scale from 1 (none of the time) to 5 (all of the time); e.g., How often do you have problems learning about your medical condition because of difficulty understanding written information?          | 2.79 (0.59)   | 2.80 (0.66)            | 2.78 (0.52)       | 0.02<br>(-0.35, 0.39)   |
| Missing                                                                                                                                                                                                                                             | 2             | 1                      | 1                 |                         |
| <b>Perceived Efficacy in Patient-Provider Interactions:</b> 10-item, 5-point Likert scale from 1 (not confident) to 5 (completely confident); e.g., how confident are you in your ability to know what questions to ask a healthcare provider?      | 4.44 (0.65)   | 4.23 (0.80)            | 4.68 (0.28)       | -0.45<br>(-0.82, -0.09) |
| <b>Patient Activation for Managing Health and Healthcare:</b> 13-item, 5-point Likert scale from 1 (strongly disagree) to 5 (strongly agree); e.g., when all is said and done, I am the person who is responsible for managing my health condition. | 4.32 (0.54)   | 4.28 (0.53)            | 4.36 (0.55)       | -0.08<br>(-0.41, 0.26)  |
| <b>Anxiety:</b> 6-item, 4-point Likert scale from 1 (not at all) to 4 (very much); e.g., I am tense.                                                                                                                                                | 1.95 (0.68)   | 1.94 (0.80)            | 1.97 (0.55)       | -0.03<br>(-0.45, 0.39)  |
| Missing                                                                                                                                                                                                                                             | 1             | 1                      | 0                 |                         |
| <b>Distress:</b> 1-item, 10-point distress thermometer from 1 (no distress) to 10 (extreme distress)                                                                                                                                                | 3.66 (2.73)   | 3.39 (2.76)            | 3.95 (2.73)       | -0.56<br>(-2.23, 1.11)  |
| <b>Technical Aspects of Care: 3-item, 7-point Likert scale from 1 (not at all) to 7 (very much)</b>                                                                                                                                                 |               |                        |                   |                         |
| <b>How satisfied are you with your understanding of the technical aspects of your treatment?</b>                                                                                                                                                    | 5.53 (1.47)   | 5.48 (1.47)            | 5.60 (1.50)       | -0.12<br>(-1.04, 0.80)  |
| Missing                                                                                                                                                                                                                                             | 1             | 0                      | 1                 |                         |
| <b>Do you feel that adequate time has been devoted to explaining the technical aspects of your treatment?</b>                                                                                                                                       | 5.67 (1.55)   | 5.61 (1.62)            | 5.75 (1.52)       | -0.14<br>(-1.11, 0.82)  |
| Missing                                                                                                                                                                                                                                             | 1             | 0                      | 1                 |                         |
| <b>Do you feel that adequate personnel were available to discuss the technical aspects of your treatment?</b>                                                                                                                                       | 5.98 (1.35)   | 6.00 (1.21)            | 5.95 (1.54)       | 0.05<br>(-0.81, 0.91)   |
| Missing                                                                                                                                                                                                                                             | 1             | 0                      | 1                 |                         |
| <b>How satisfied are you with your overall radiation oncology experience?</b> 1-item, 7-point Likert scale from 1 (not at all) to 7 (very much)                                                                                                     | 5.12 (1.69)   | 5.17 (1.67)            | 5.05 (1.76)       | 0.12<br>(-0.94, 1.19)   |
| Missing                                                                                                                                                                                                                                             | 1             | 0                      | 1                 |                         |

sd, standard deviation; CI, confidence interval

## **Medical Physics Direct Patient Care Initiative – Communication Intervention Study**

- 1) Patient Pre-Interaction Survey
- 2) Patient Post-Interaction Survey

## Medical Physics Direct Patient Care Initiative – Communication Intervention Study

### Patient Pre-Interaction Survey

With which racial/ethnic group do you most closely identify?

- African-American or Black
- Caucasian or White
- Asian
- Native Hawaiian or Other Pacific Islander
- American Indian or Native Alaskan
- Other race or multiple races (Please specify):

Do you consider yourself Hispanic or Latino?

- Yes
- No

With which gender group do you most closely identify?

- Male
- Female
- Trans\*
- Other

When were you born (MM/DD/YYYY)?

What is the highest level of education you have completed?

- Less than high school
- High school / GED
- Some college
- 2-year college degree
- 4-year college degree
- Graduate/professional degree

Which of these terms best describes your current marital or personal status?



- Married
- Living with a partner in a marriage-like relationship
- Widowed
- Divorced
- Separated
- Never married

What was your household income last year (before taxes)?

- Less than \$20,000
- \$20,000 - \$39,999
- \$40,000 - \$59,999
- \$60,000 - \$79,999
- \$80,000 - \$99,999
- \$100,000 - \$149,000
- \$150,000 or more

What kind of health insurance do you currently have? (Select all the choices that apply)

- Medicaid
- Medicare
- Medicare supplemental insurance
- Private insurance (purchased through you or your partner/family member's employer)
- Private insurance (purchased on your own - not through an employer)
- I do not have insurance

Which statement best describes your current employment status?

- Employed full time
- Employed part time
- Caring for home and/or family (not employed & looking for paid work)
- Unemployed and looking for work
- Unable to work due to illness or disability
- Retired
- Student

- Other (please explain)

How often do you have someone (like a family member, friend, hospital/clinic worker or caregiver) help you read hospital materials?

- All of the time
- Most of the time
- Some of the time
- A little of the time
- None of the time

How often do you have problems learning about your medical condition because of difficulty understanding written information?

- All of the time
- Most of the time
- Some of the time
- A little of the time
- None of the time

How confident are you filling out forms by yourself?

- All of the time
- Most of the time
- Some of the time
- A little of the time
- None of the time

The next set of questions concern your feelings about healthcare providers, **in general**. Again, your answers will be kept completely private. Your doctors and nurses will never know how you answered the questions.

How confident are you in your ability to get a healthcare provider to pay attention to what you have to say?

Not confident       Slightly confident      Somewhat confident      Moderately confident      Completely confident

How confident are you in your ability to know what questions to ask a healthcare provider?

Not confident

Slightly confident

Somewhat confident

Moderately confident

Completely confident

How confident are you in your ability to get a healthcare provider to answer all of your questions?

Not confident

Slightly confident

Somewhat confident

Moderately confident

Completely confident

How confident are you in your ability to ask a healthcare provider questions about your chief health concern?

Not confident

Slightly confident

Somewhat confident

Moderately confident

Completely confident

How confident are you in your ability to make the most of your visit with a healthcare provider?

Not confident

Slightly confident

Somewhat confident

Moderately confident

Completely confident

How confident are you in your ability to get a healthcare provider to take your chief health concern seriously?

Not confident

Slightly confident

Somewhat confident

Moderately confident

Completely confident

How confident are you in your ability to understand what a healthcare provider tells you?

Not confident

Slightly confident

Somewhat confident

Moderately confident

Completely confident

How confident are you in your ability to get a healthcare provider to do something about your chief health concern?

- |                       |                       |                       |                       |                       |
|-----------------------|-----------------------|-----------------------|-----------------------|-----------------------|
| Not confident         | Slightly confident    | Somewhat confident    | Moderately confident  | Completely confident  |
| <input type="radio"/> |

How confident are you in your ability to explain your chief health concern to a healthcare provider?

- |                       |                       |                       |                       |                       |
|-----------------------|-----------------------|-----------------------|-----------------------|-----------------------|
| Not confident         | Slightly confident    | Somewhat confident    | Moderately confident  | Completely confident  |
| <input type="radio"/> |

How confident are you in your ability to explain your ability to ask a healthcare provider for more information if you don't understand what he or she said?

- |                       |                       |                       |                       |                       |
|-----------------------|-----------------------|-----------------------|-----------------------|-----------------------|
| Not confident         | Slightly confident    | Somewhat confident    | Moderately confident  | Completely confident  |
| <input type="radio"/> |

Please indicate how much you agree or disagree with the following statements:

When all is said and done, I am the person who is responsible for managing my health condition.

- |                       |                       |                            |                       |                       |
|-----------------------|-----------------------|----------------------------|-----------------------|-----------------------|
| Strongly disagree     | Disagree              | Neither agree nor disagree | Agree                 | Strongly agree        |
| <input type="radio"/> | <input type="radio"/> | <input type="radio"/>      | <input type="radio"/> | <input type="radio"/> |

Taking an active role in my own healthcare is the most important factor in determining my health and ability to function.

- |                       |                       |                            |                       |                       |
|-----------------------|-----------------------|----------------------------|-----------------------|-----------------------|
| Strongly disagree     | Disagree              | Neither agree nor disagree | Agree                 | Strongly agree        |
| <input type="radio"/> | <input type="radio"/> | <input type="radio"/>      | <input type="radio"/> | <input type="radio"/> |

I am confident that I can take actions that will help prevent or minimize some symptoms or problems associated with my health condition.

- |                       |                       |                            |                       |                       |
|-----------------------|-----------------------|----------------------------|-----------------------|-----------------------|
| Strongly disagree     | Disagree              | Neither agree nor disagree | Agree                 | Strongly agree        |
| <input type="radio"/> | <input type="radio"/> | <input type="radio"/>      | <input type="radio"/> | <input type="radio"/> |

I know what each of my prescribed medications do.

|                       |                       |                            |                       |                       |
|-----------------------|-----------------------|----------------------------|-----------------------|-----------------------|
| Strongly disagree     | Disagree              | Neither agree nor disagree | Agree                 | Strongly agree        |
| <input type="radio"/> | <input type="radio"/> | <input type="radio"/>      | <input type="radio"/> | <input type="radio"/> |

I am confident that I can tell when I need to do to get my medical care and when I can handle a health problem myself.

|                       |                       |                            |                       |                       |
|-----------------------|-----------------------|----------------------------|-----------------------|-----------------------|
| Strongly disagree     | Disagree              | Neither agree nor disagree | Agree                 | Strongly agree        |
| <input type="radio"/> | <input type="radio"/> | <input type="radio"/>      | <input type="radio"/> | <input type="radio"/> |

I am confident I can tell my healthcare provider concerns I have even when he or she does not ask.

|                       |                       |                            |                       |                       |
|-----------------------|-----------------------|----------------------------|-----------------------|-----------------------|
| Strongly disagree     | Disagree              | Neither agree nor disagree | Agree                 | Strongly agree        |
| <input type="radio"/> | <input type="radio"/> | <input type="radio"/>      | <input type="radio"/> | <input type="radio"/> |

I am confident I can follow through on medical treatments I need to do at home.

|                       |                       |                            |                       |                       |
|-----------------------|-----------------------|----------------------------|-----------------------|-----------------------|
| Strongly disagree     | Disagree              | Neither agree nor disagree | Agree                 | Strongly agree        |
| <input type="radio"/> | <input type="radio"/> | <input type="radio"/>      | <input type="radio"/> | <input type="radio"/> |

I understand the nature and causes of my health condition(s).

|                       |                       |                            |                       |                       |
|-----------------------|-----------------------|----------------------------|-----------------------|-----------------------|
| Strongly disagree     | Disagree              | Neither agree nor disagree | Agree                 | Strongly agree        |
| <input type="radio"/> | <input type="radio"/> | <input type="radio"/>      | <input type="radio"/> | <input type="radio"/> |

I know the different medical treatment options available for my health condition.

|                       |                       |                            |                       |                       |
|-----------------------|-----------------------|----------------------------|-----------------------|-----------------------|
| Strongly disagree     | Disagree              | Neither agree nor disagree | Agree                 | Strongly agree        |
| <input type="radio"/> | <input type="radio"/> | <input type="radio"/>      | <input type="radio"/> | <input type="radio"/> |

I have been able to maintain the lifestyle changes for my health that I have made.

|                       |                       |                            |                       |                       |
|-----------------------|-----------------------|----------------------------|-----------------------|-----------------------|
| Strongly disagree     | Disagree              | Neither agree nor disagree | Agree                 | Strongly agree        |
| <input type="radio"/> | <input type="radio"/> | <input type="radio"/>      | <input type="radio"/> | <input type="radio"/> |

I know how to prevent further problems with my health condition.

|                       |                       |                            |                       |                       |
|-----------------------|-----------------------|----------------------------|-----------------------|-----------------------|
| Strongly disagree     | Disagree              | Neither agree nor disagree | Agree                 | Strongly agree        |
| <input type="radio"/> | <input type="radio"/> | <input type="radio"/>      | <input type="radio"/> | <input type="radio"/> |

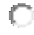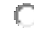

I am confident I can figure out solutions when new situations or problems arise with my health condition.

Strongly disagree  Disagree  Neither agree nor disagree  Agree  Strongly agree

I am confident that I can maintain lifestyle changes like diet and exercise even during times of stress.

Strongly disagree  Disagree  Neither agree nor disagree  Agree  Strongly agree

Below are statements that describe a feeling that may or may not describe how you are feeling **right now**. Read each statement and using the scale shown, select the response that best represents how well that statement describes you.

|                | <b>Not at all</b>                | <b>Somewhat</b>                | <b>Moderately</b>                | <b>Very Much</b>                |
|----------------|----------------------------------|--------------------------------|----------------------------------|---------------------------------|
| <b>Calm</b>    | <input type="radio"/> Not at all | <input type="radio"/> Somewhat | <input type="radio"/> Moderately | <input type="radio"/> Very Much |
| <b>Tense</b>   | <input type="radio"/> Not at all | <input type="radio"/> Somewhat | <input type="radio"/> Moderately | <input type="radio"/> Very Much |
| <b>Upset</b>   | <input type="radio"/> Not at all | <input type="radio"/> Somewhat | <input type="radio"/> Moderately | <input type="radio"/> Very Much |
| <b>Relaxed</b> | <input type="radio"/> Not at all | <input type="radio"/> Somewhat | <input type="radio"/> Moderately | <input type="radio"/> Very Much |
| <b>Content</b> | <input type="radio"/> Not at all | <input type="radio"/> Somewhat | <input type="radio"/> Moderately | <input type="radio"/> Very Much |
| <b>Worried</b> | <input type="radio"/> Not at all | <input type="radio"/> Somewhat | <input type="radio"/> Moderately | <input type="radio"/> Very Much |

Please look at the picture below. 0 means no distress, and 10 means extreme distress.



## Patient Post-Interaction Survey

Thank you for being part of our research study. The purpose of the study is to learn about how we can improve anxiety and distress during radiation therapy treatments. Your answers will be kept completely private. Your doctors and nurses will never know how you answered the questions.

If any questions concern you or are unclear, please feel free to stop and ask the research assistant about them. Also, please remember you do not have to answer any question that you don't want to.

The medical physicist did not fully discuss with me the technical aspects of my treatment.

|                       |                       |                            |                       |                       |
|-----------------------|-----------------------|----------------------------|-----------------------|-----------------------|
| Strongly Disagree     | Somewhat Disagree     | Neither Agree nor Disagree | Somewhat Agree        | Strongly Agree        |
| <input type="radio"/> | <input type="radio"/> | <input type="radio"/>      | <input type="radio"/> | <input type="radio"/> |

The medical physicist showed a genuine interest in my health.

|                       |                       |                            |                       |                       |
|-----------------------|-----------------------|----------------------------|-----------------------|-----------------------|
| Strongly Disagree     | Somewhat Disagree     | Neither Agree nor Disagree | Somewhat Agree        | Strongly Agree        |
| <input type="radio"/> | <input type="radio"/> | <input type="radio"/>      | <input type="radio"/> | <input type="radio"/> |

The medical physicist encouraged me to express concerns and worries.

|                       |                       |                            |                       |                       |
|-----------------------|-----------------------|----------------------------|-----------------------|-----------------------|
| Strongly Disagree     | Somewhat Disagree     | Neither Agree nor Disagree | Somewhat Agree        | Strongly Agree        |
| <input type="radio"/> | <input type="radio"/> | <input type="radio"/>      | <input type="radio"/> | <input type="radio"/> |

The medical physicist made me feel completely at ease during the consultation.

|                       |                       |                            |                       |                       |
|-----------------------|-----------------------|----------------------------|-----------------------|-----------------------|
| Strongly Disagree     | Somewhat Disagree     | Neither Agree nor Disagree | Somewhat Agree        | Strongly Agree        |
| <input type="radio"/> | <input type="radio"/> | <input type="radio"/>      | <input type="radio"/> | <input type="radio"/> |

The medical physicist did not treat me as an equal in this consultation.

|                       |                       |                            |                       |                       |
|-----------------------|-----------------------|----------------------------|-----------------------|-----------------------|
| Strongly Disagree     | Somewhat Disagree     | Neither Agree nor Disagree | Somewhat Agree        | Strongly Agree        |
| <input type="radio"/> | <input type="radio"/> | <input type="radio"/>      | <input type="radio"/> | <input type="radio"/> |

The medical physicist thoroughly explained everything to me.

|                       |                       |                            |                       |                       |
|-----------------------|-----------------------|----------------------------|-----------------------|-----------------------|
| Strongly Disagree     | Somewhat Disagree     | Neither Agree nor Disagree | Somewhat Agree        | Strongly Agree        |
| <input type="radio"/> | <input type="radio"/> | <input type="radio"/>      | <input type="radio"/> | <input type="radio"/> |

The medical physicist assured that I understood my treatment plan.

|                       |                       |                            |                       |                       |
|-----------------------|-----------------------|----------------------------|-----------------------|-----------------------|
| Strongly Disagree     | Somewhat Disagree     | Neither Agree nor Disagree | Somewhat Agree        | Strongly Agree        |
| <input type="radio"/> | <input type="radio"/> | <input type="radio"/>      | <input type="radio"/> | <input type="radio"/> |

The medical physicist was very informative about my treatment plan.

|                       |                       |                            |                       |                       |
|-----------------------|-----------------------|----------------------------|-----------------------|-----------------------|
| Strongly Disagree     | Somewhat Disagree     | Neither Agree nor Disagree | Somewhat Agree        | Strongly Agree        |
| <input type="radio"/> | <input type="radio"/> | <input type="radio"/>      | <input type="radio"/> | <input type="radio"/> |



The medical physicist asked for my thoughts about my treatment plan.

|                       |                       |                            |                       |                       |
|-----------------------|-----------------------|----------------------------|-----------------------|-----------------------|
| Strongly Disagree     | Somewhat Disagree     | Neither Agree nor Disagree | Somewhat Agree        | Strongly Agree        |
| <input type="radio"/> | <input type="radio"/> | <input type="radio"/>      | <input type="radio"/> | <input type="radio"/> |

The medical physicist's explanations and recommendations were clear and easy to understand.

|                       |                       |                            |                       |                       |
|-----------------------|-----------------------|----------------------------|-----------------------|-----------------------|
| Strongly Disagree     | Somewhat Disagree     | Neither Agree nor Disagree | Somewhat Agree        | Strongly Agree        |
| <input type="radio"/> | <input type="radio"/> | <input type="radio"/>      | <input type="radio"/> | <input type="radio"/> |

The medical physicist tried to reassure and comfort me.

|                       |                       |                            |                       |                       |
|-----------------------|-----------------------|----------------------------|-----------------------|-----------------------|
| Strongly Disagree     | Somewhat Disagree     | Neither Agree nor Disagree | Somewhat Agree        | Strongly Agree        |
| <input type="radio"/> | <input type="radio"/> | <input type="radio"/>      | <input type="radio"/> | <input type="radio"/> |

The medical physicist seemed to care about my feelings.

|                       |                       |                            |                       |                       |
|-----------------------|-----------------------|----------------------------|-----------------------|-----------------------|
| Strongly Disagree     | Somewhat Disagree     | Neither Agree nor Disagree | Somewhat Agree        | Strongly Agree        |
| <input type="radio"/> | <input type="radio"/> | <input type="radio"/>      | <input type="radio"/> | <input type="radio"/> |

Below are statements that describe a feeling that may or may not describe how you are feeling **right now**. Read each statement and using the scale shown, select the response that best represents how well that statement describes you.

|                | <b>Not at all</b>                | <b>Somewhat</b>                | <b>Moderately</b>                | <b>Very Much</b>                |
|----------------|----------------------------------|--------------------------------|----------------------------------|---------------------------------|
| <b>Calm</b>    | <input type="radio"/> Not at all | <input type="radio"/> Somewhat | <input type="radio"/> Moderately | <input type="radio"/> Very Much |
| <b>Tense</b>   | <input type="radio"/> Not at all | <input type="radio"/> Somewhat | <input type="radio"/> Moderately | <input type="radio"/> Very Much |
| <b>Upset</b>   | <input type="radio"/> Not at all | <input type="radio"/> Somewhat | <input type="radio"/> Moderately | <input type="radio"/> Very Much |
| <b>Relaxed</b> | <input type="radio"/> Not at all | <input type="radio"/> Somewhat | <input type="radio"/> Moderately | <input type="radio"/> Very Much |
| <b>Content</b> | <input type="radio"/> Not at all | <input type="radio"/> Somewhat | <input type="radio"/> Moderately | <input type="radio"/> Very Much |
| <b>Worried</b> | <input type="radio"/> Not at all | <input type="radio"/> Somewhat | <input type="radio"/> Moderately | <input type="radio"/> Very Much |

Please look at the picture below. 0 means no distress, and 10 means extreme distress.
